# Supplementary material
Source: HighWire-hosted journal article supplement (http://www.cmaj.ca/highwire/filestream/59202/field_highwire_adjunct_files/7/strep-cohen-5-at.pdf)
Supplement: strep-cohen-5-at.pdf [file strep-cohen-5-at.pdf]

## Appendix 5 (as supplied by the authors): Multiple imputations of missing data

### Patterns of missing values for clinical predictors (n=676)

Complete case analysis would have led to excluding 129/676 patients (19%).

| Clinical signs or symptoms                  | Missing values | Percentage |
|---------------------------------------------|----------------|------------|
| Sudden onset                                | 7              | 1.04       |
| Sore throat/pain in throat                  | 32             | 4.73       |
| Body temperature                            | 3              | 0.44       |
| Headache                                    | 14             | 2.07       |
| Abdominal pain                              | 9              | 1.33       |
| Abnormal pharynx                            |                |            |
| Erythema/redness                            | 4              | 0.59       |
| Petechiae (pharynx/palate)/doughnut lesions | 42             | 6.21       |
| Tonsillar swelling                          | 18             | 2.66       |
| Exudate (pharynx/tonsils)                   | 10             | 1.48       |
| Cervical lymph nodes                        |                |            |
| Swelling/enlargement                        | 4              | 0.59       |
| Tenderness                                  | 28             | 4.14       |
| Scarlatiniform rash                         | 10             | 1.48       |
| Conjunctivitis                              | 5              | 0.74       |
| Rhinitis/coryza/rhinorrhea                  | 3              | 0.44       |
| Cough                                       | 12             | 1.78       |
| Diarrhea                                    | 13             | 1.92       |

**Characteristics of patients with at least one missing data and complete cases**

| Clinical signs or symptoms                  | Patients with at least one missing value (n=129) | Complete cases (n=547) | <i>p</i> <sup>a</sup> |
|---------------------------------------------|--------------------------------------------------|------------------------|-----------------------|
| Positive throat culture for GAS             | 63/129 (48.8)                                    | 217/547 (39.7)         | 0.057                 |
| Age, years (SD) <sup>b</sup>                | 5.7 (2.4)                                        | 6.2 (2.5)              | 0.055                 |
| Sudden onset                                | 97/122 (79.5)                                    | 440/547 (80.4)         | 0.815                 |
| Sore throat/pain in throat <sup>c</sup>     | 101/121 (83.5)                                   | 441/523 (84.3)         | 0.817                 |
| Body temperature > 38°C                     | 105/129 (81.4)                                   | 414/547 (75.7)         | 0.167                 |
| Headache                                    | 24/115 (20.9)                                    | 162/547 (29.6)         | 0.058                 |
| Abdominal pain                              | 48/120 (40.0)                                    | 176/547 (32.2)         | 0.100                 |
| Abnormal pharynx                            |                                                  |                        |                       |
| Erythema/redness <sup>d</sup>               | 110/126 (87.3)                                   | 489/546 (89.6)         | 0.463                 |
| Petechiae (pharynx/palate)/doughnut lesions | 15/87 (17.2)                                     | 101/547 (18.5)         | 0.784                 |
| Tonsillar swelling                          | 86/111 (77.5)                                    | 391/547 (71.5)         | 0.197                 |
| Exudate (pharynx/tonsils) <sup>d</sup>      | 28/125 (22.4)                                    | 116/541 (21.4)         | 0.815                 |
| Cervical lymph nodes                        |                                                  |                        |                       |
| Swelling/enlargement                        | 86/125 (68.8)                                    | 302/547 (55.2)         | 0.006                 |
| Tenderness                                  | 22/101 (21.8)                                    | 109/547 (19.9)         | 0.670                 |
| Scarlatiniform rash                         | 17/119 (14.3)                                    | 52/547 (9.5)           | 0.121                 |
| Conjunctivitis                              | 3/124 (2.4)                                      | 16/547 (2.9)           | 0.759                 |
| Rhinitis/coryza/rhinorrhea                  | 48/126 (38.1)                                    | 204/547 (37.3)         | 0.867                 |
| Cough                                       | 48/117 (41.0)                                    | 214/547 (39.1)         | 0.702                 |
| Diarrhea                                    | 10/116 (8.6)                                     | 23/547 (4.2)           | 0.047                 |

Data are no./N of patients (%). <sup>a</sup>Chi-square or Fisher's exact test; <sup>b</sup>Student's *t* test; <sup>c</sup>Missing values in the complete case analysis because this criterion was scored only for the Breese score, which accepts missing values; <sup>d</sup>Missing values in the complete case analysis because these variables are always scored in combination with other variables using "and/or" operators, which is compatible with missing values.

### Multiple Imputation of missing data

We used multiple imputations with chained equations (MICE) because of missing values in almost all clinical variables necessary for the validation of the CPRs we identified [1]. MICE was performed in STATA 13/SE ( $m=10$ ). Analyses were repeated in each imputed dataset and estimates of interest were combined by using Rubin's rules [2].

### Convergence and imputation diagnostics

Convergence of the MICE algorithm was checked by graphically investigating the trends in the means and standard deviations of the imputed values over 100 iterations. The trace plots did not show apparent trends in the summaries of the imputed values, so the number of burn-in iterations was set to 10. The distributions of imputed and observed values were compared graphically. Distributional plots did not show significant departure between imputed values and observed values. We concluded that the fit of the imputation model was good.

### Comparison of complete case analysis versus multiple imputations analysis

We compared the results from analyses restricted to complete cases with results from analyses with multiple imputations. Overall, complete case analysis seemed to produce slightly higher estimates for both sensitivity and specificity.

|         | Sensitivity, % (95% CI) |                   | Specificity, % (95% CI) |                  |
|---------|-------------------------|-------------------|-------------------------|------------------|
|         | CC <sup>a</sup>         | MICE <sup>b</sup> | CC                      | MICE             |
| Breese  | 89.9 (85.1–93.5)        | 87.9 (84.1–91.8)  | 82.4 (77.9–86.4)        | 82.0 (78.2–85.8) |
| Edmond  | 68.7 (62.0–74.8)        | 66.1 (60.5–71.7)  | 86.1 (81.8–89.6)        | 85.9 (82.4–89.3) |
| McIsaac | 94.9 (91.1–97.4)        | 94.3 (91.6–97.0)  | 53.9 (48.4–59.4)        | 53.6 (48.7–58.6) |
| Wald    | 94.9 (91.1–97.4)        | 93.9 (91.1–96.7)  | 63.9 (58.5–69.1)        | 63.0 (58.2–67.7) |
| Attia   | 87.1 (81.9–91.3)        | 87.1 (83.1–91.1)  | 87.9 (83.9–91.2)        | 87.8 (84.5–91.0) |
| Joachim | 91.8 (87.9–94.7)        | 87.5 (83.5–91.6)  | 35.1 (30.4–40.0)        | 40.1 (35.2–44.9) |

<sup>a</sup>CC, complete case analysis (n=547); <sup>b</sup>MICE, multiple imputations with chained equations analysis (n=676).

### References

1. White IR, Royston P, Wood AM: **Multiple imputation using chained equations: Issues and guidance for practice.** *Stat Med* 2011, **30**:377-399.
2. Rubin D: *Multiple Imputation for Nonresponse in Surveys.* Hoboken, NJ: J Wiley; 1987.
